# Supplementary material
Source: ML conference proceedings conference paper supplement (https://proceedings.neurips.cc/paper_files/paper/2020/hash/0607f4c705595b911a4f3e7a127b44e0-Abstract.html)
Supplement: Supplementary file [file 0607f4c705595b911a4f3e7a127b44e0-Supplemental.zip]

Supplementary Material for  
'What is being transferred in transfer learning?'  
Criticality plots for Chexpert

Behnam Neyshabur\*  
Google  
neyshabur@google.com

Hanie Sedghi\*  
Google Brain  
hsedghi@google.com

Chiyuan Zhang\*  
Google Brain  
chiyuan@google.com

---

\*Equal contribution. Authors ordered randomly.

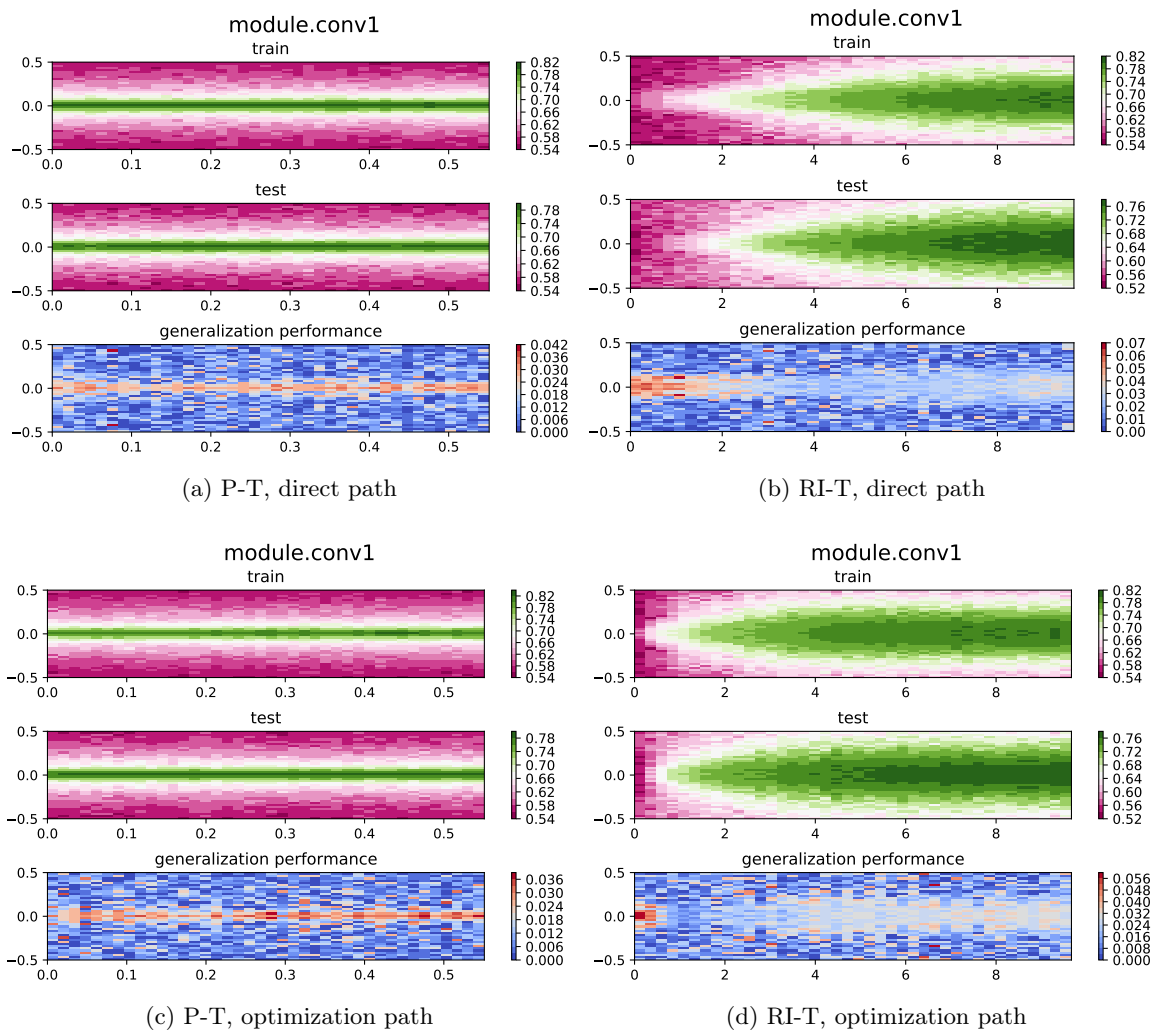

Figure 1: Module Criticality Conv1

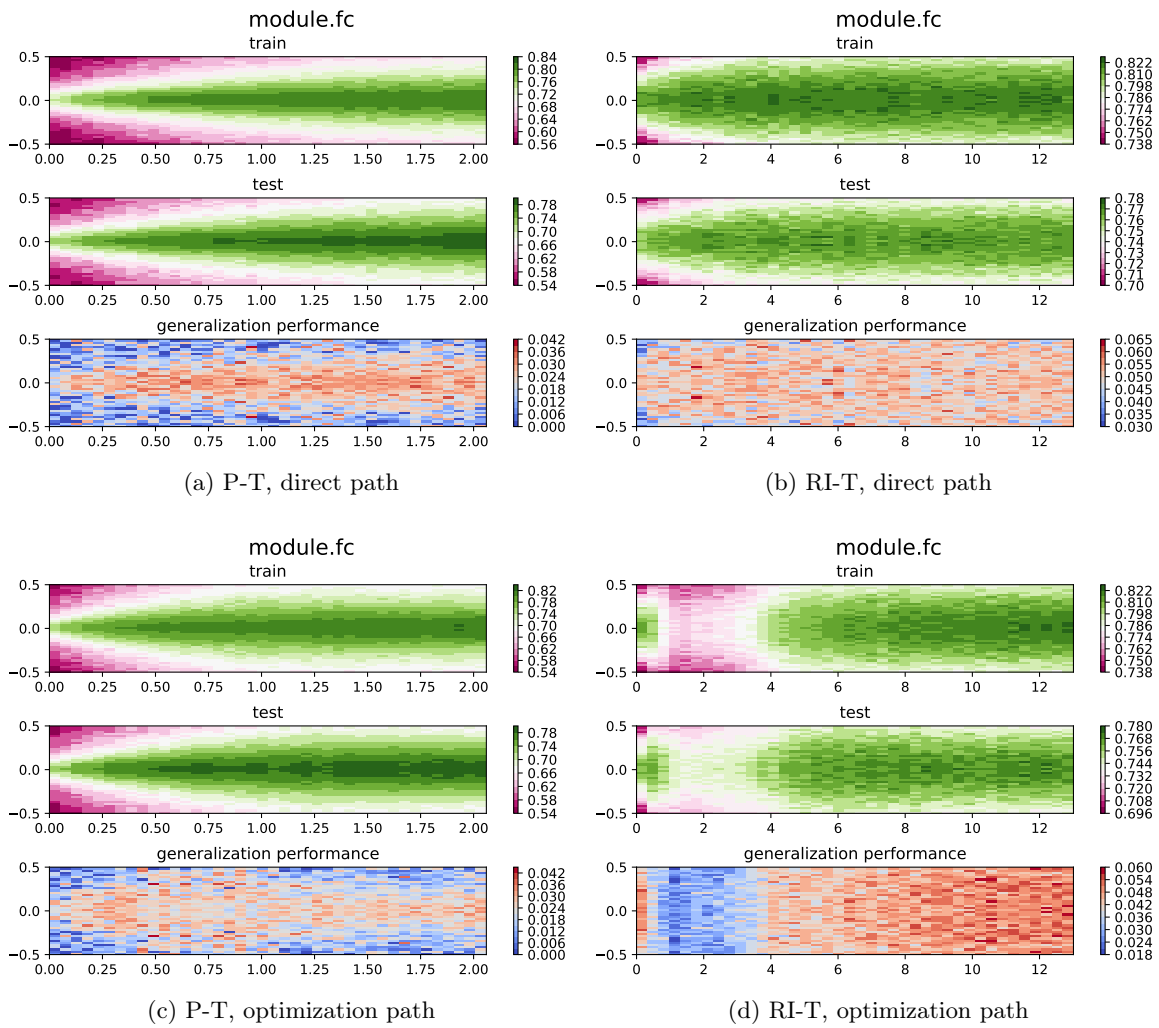

Figure 2: Module Criticality FC

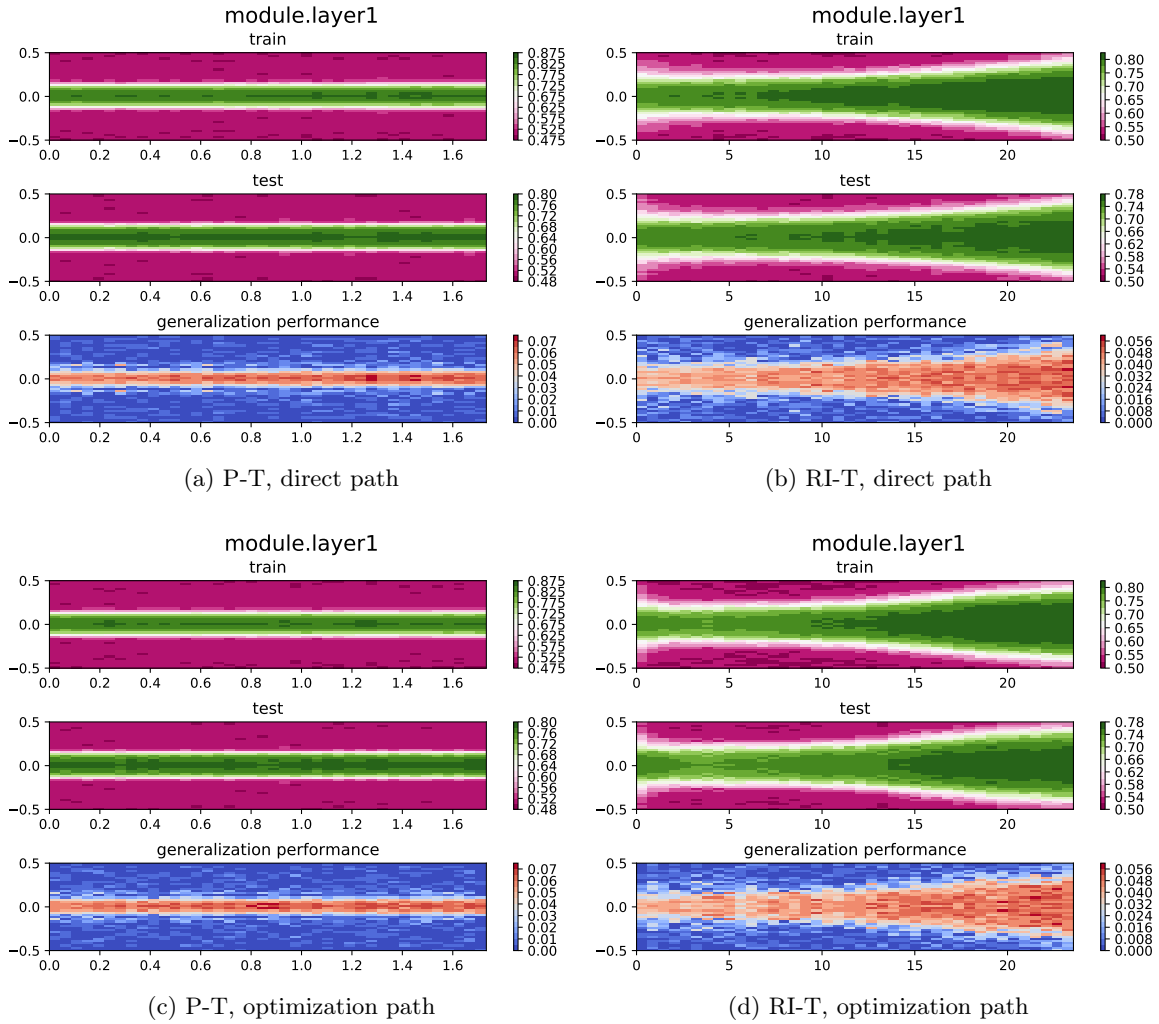

Figure 3: Module Criticality Layer1

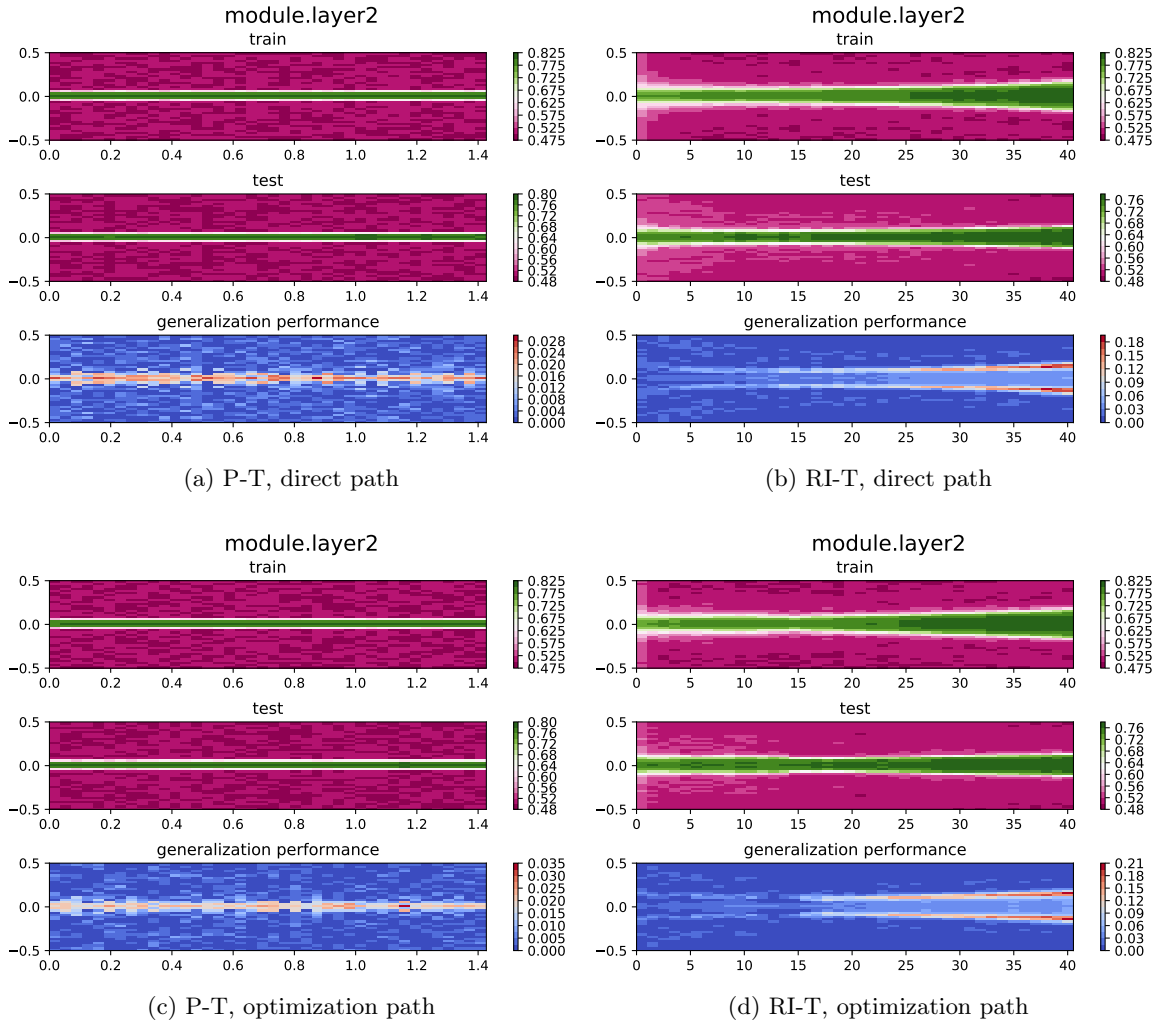

Figure 4: Module Criticality Layer2

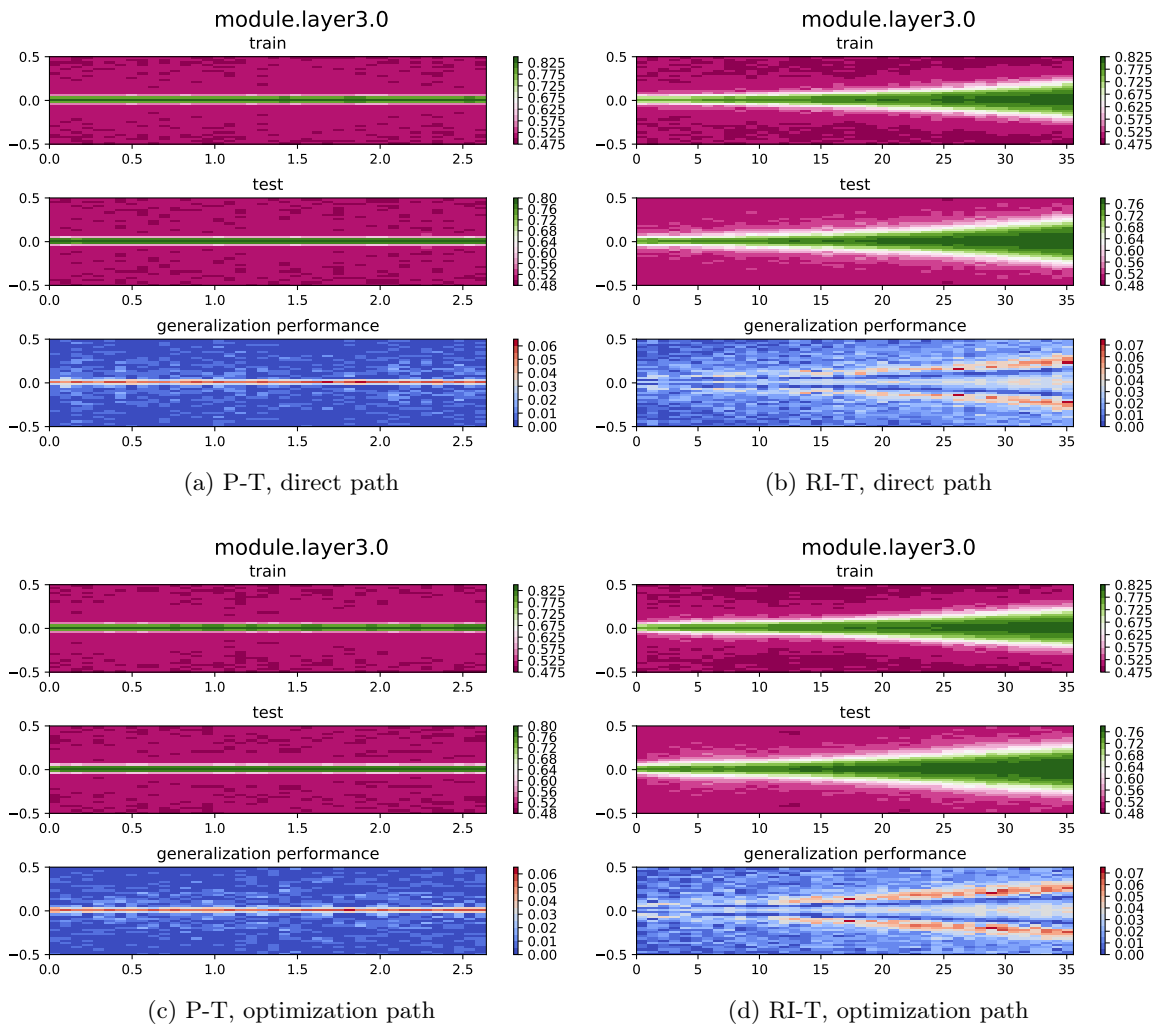

Figure 5: Module Criticality Layer3.0

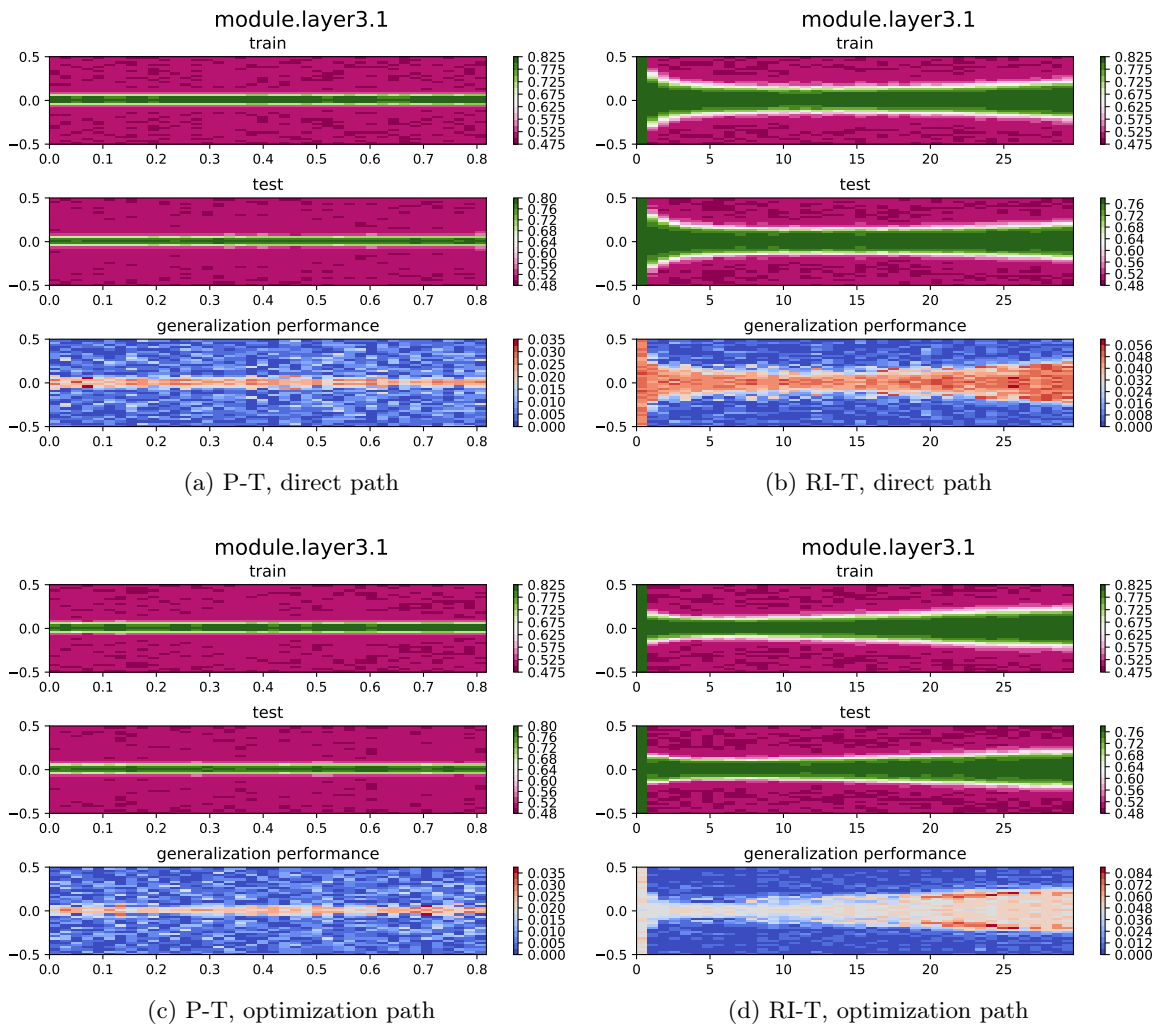

Figure 6: Module Criticality Layer3.1

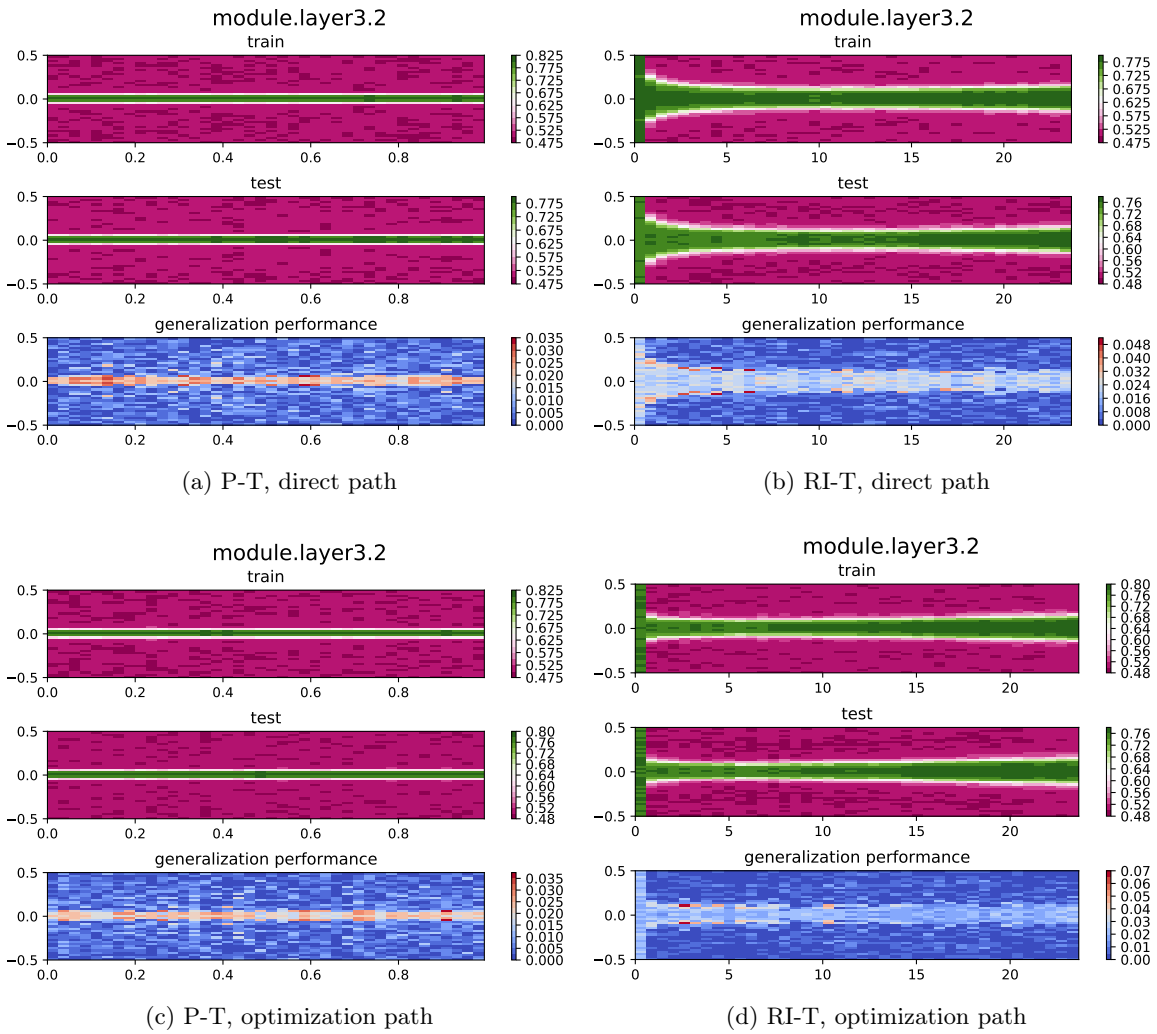

Figure 7: Module Criticality Layer3.2



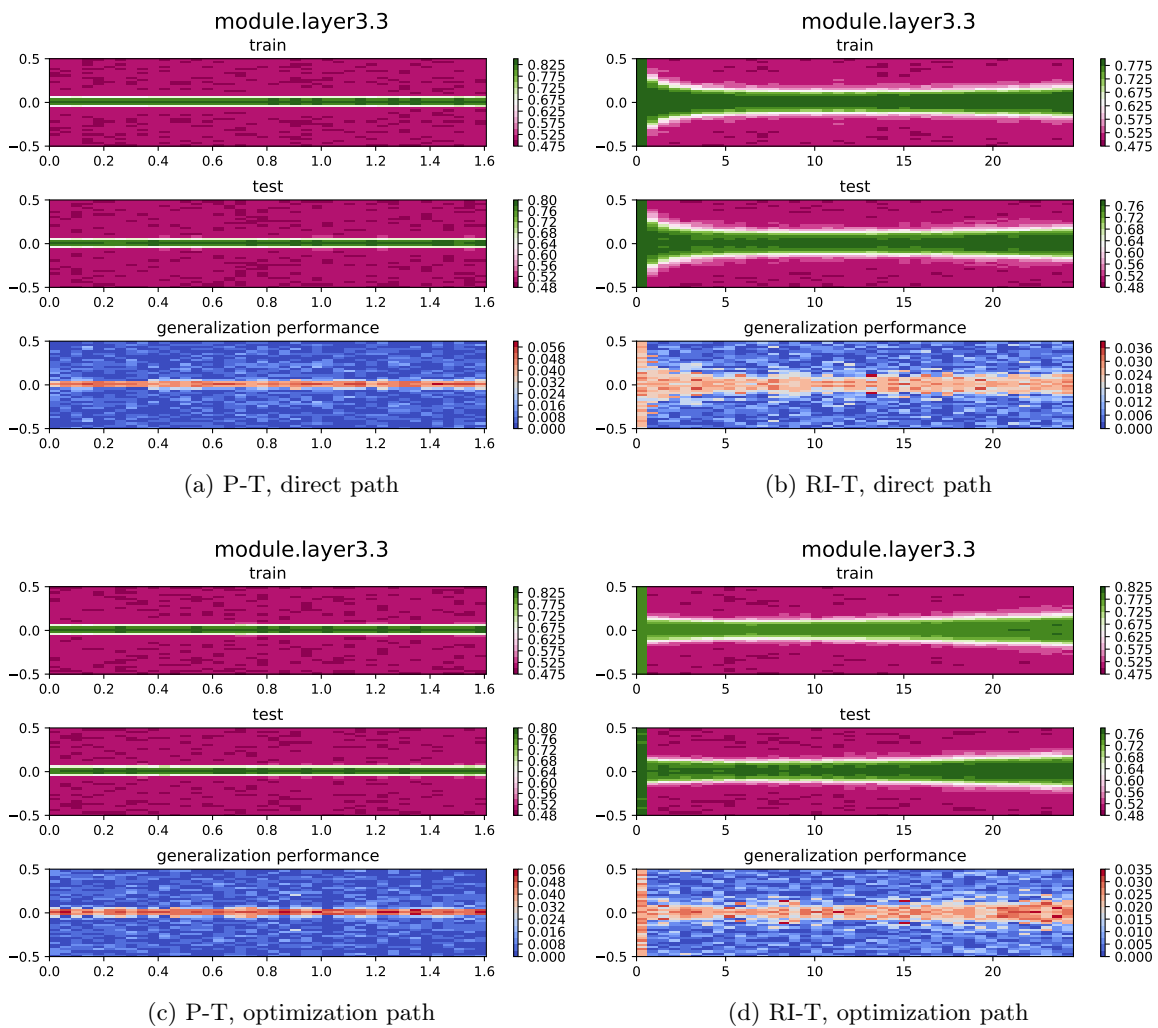

Figure 8: Module Criticality Layer3.3

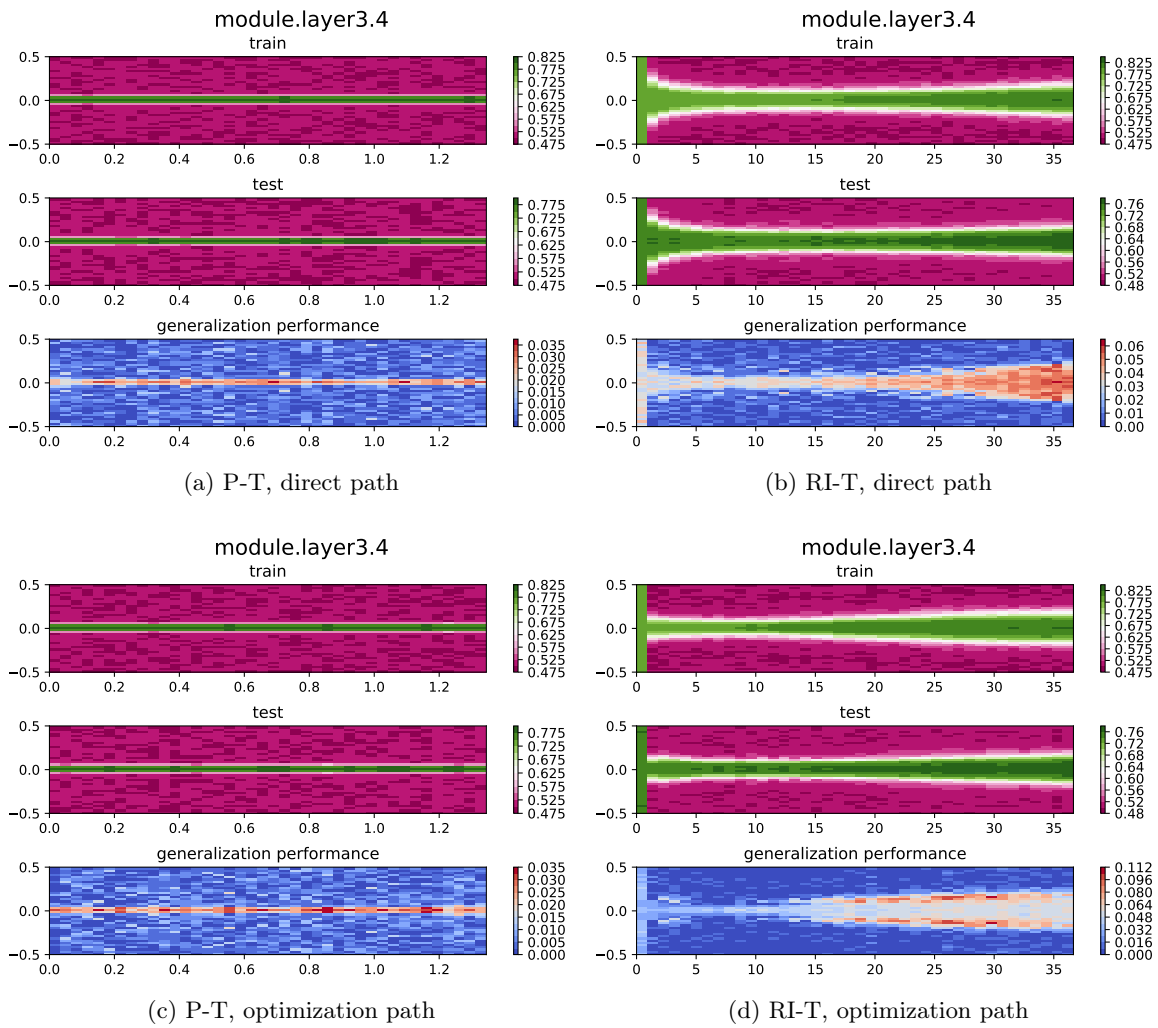

Figure 9: Module Criticality Layer3.4

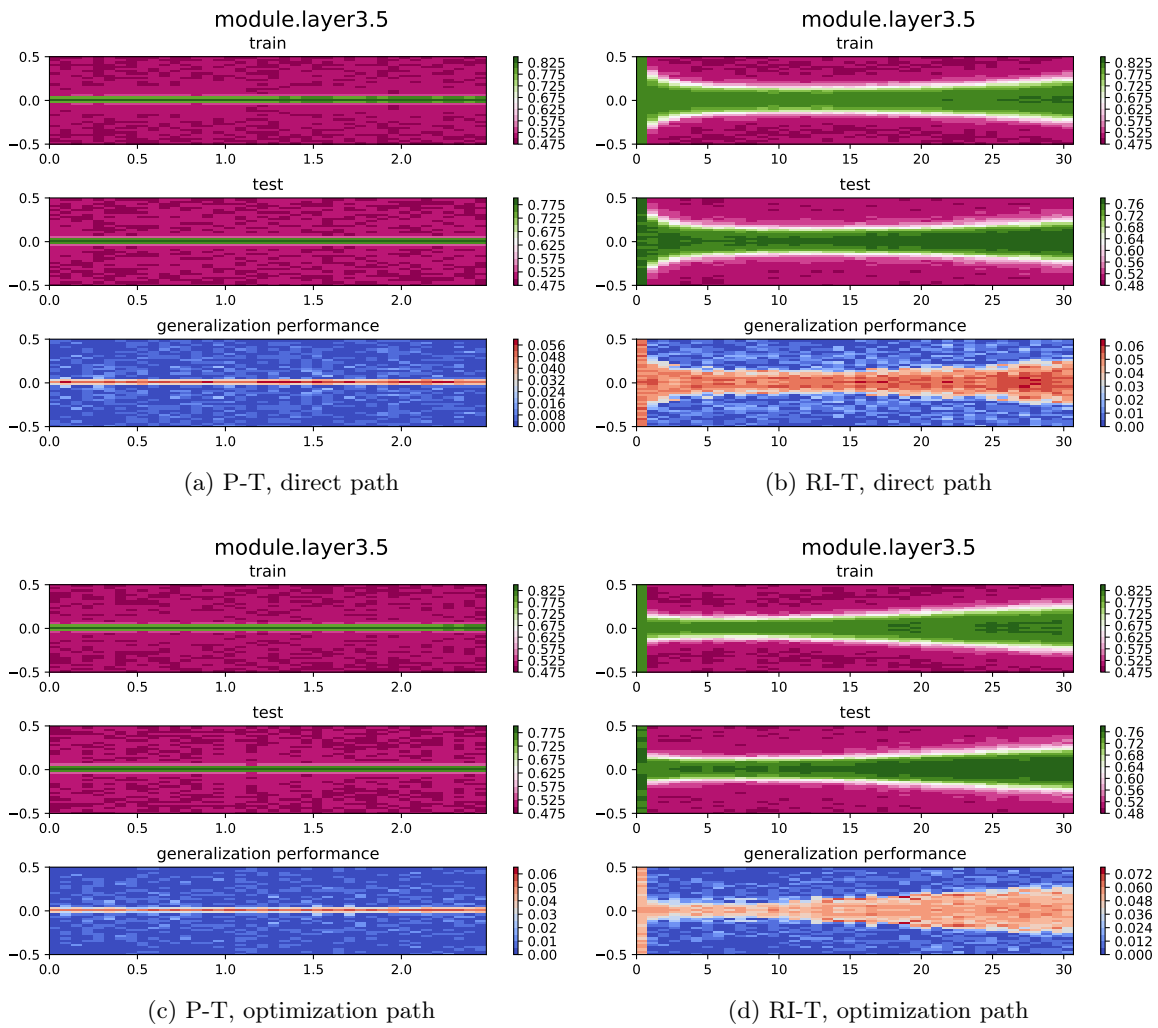

Figure 10: Module Criticality Layer3.5

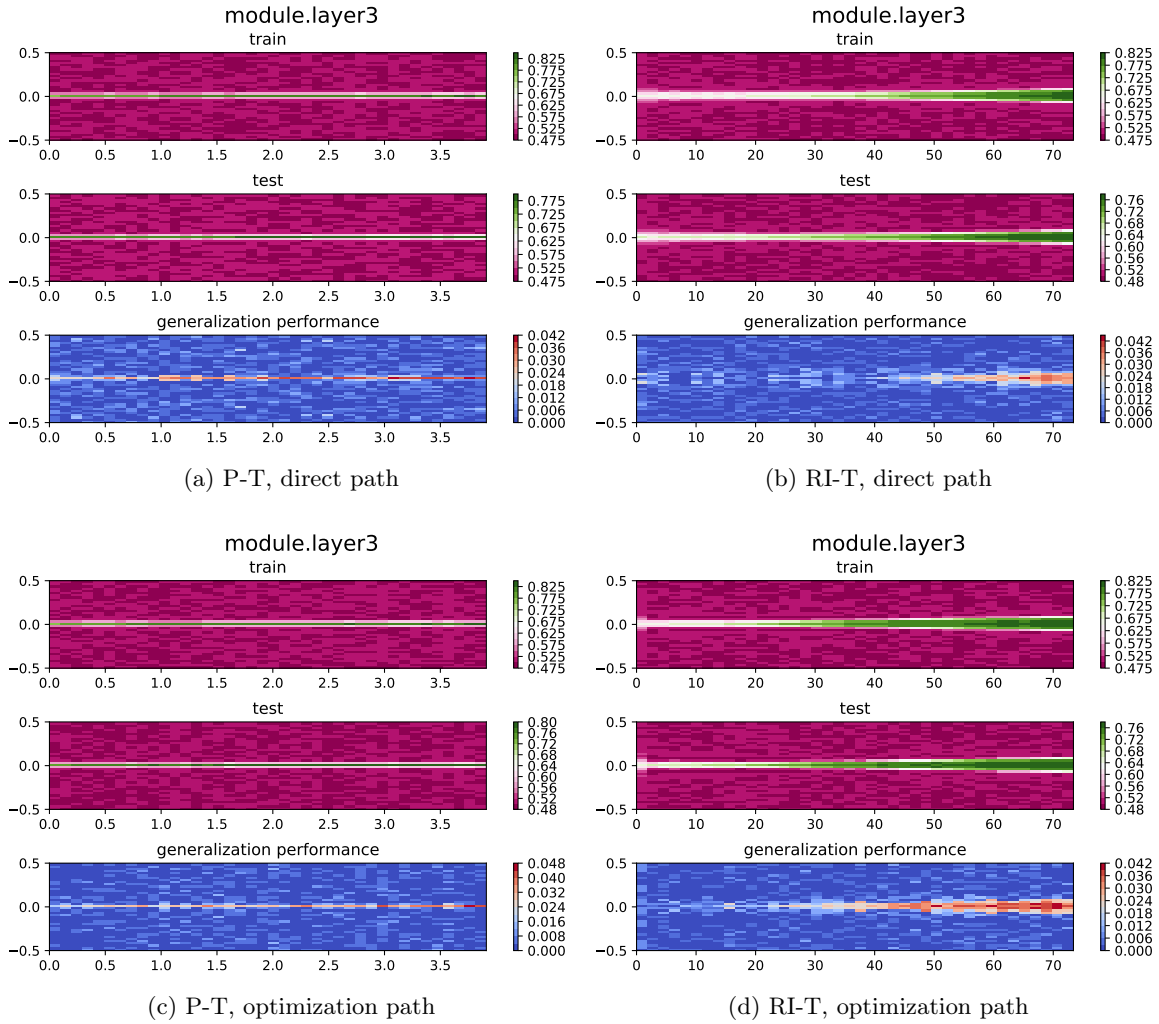

Figure 11: Module Criticality Layer3

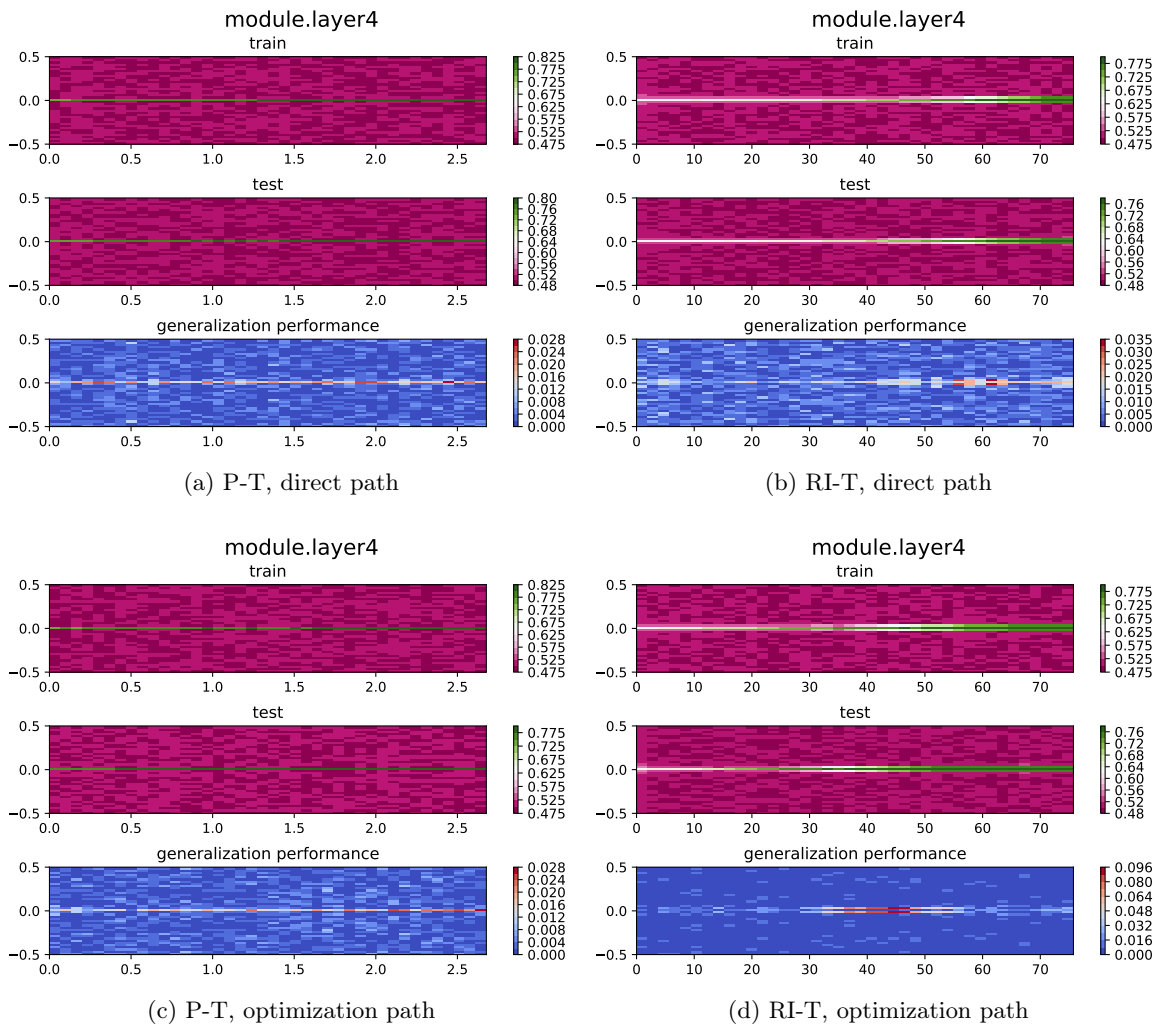

Figure 12: Module Criticality Layer4
